# Supplementary material for: An allosteric interleukin-1 receptor modulator mitigates inflammation and photoreceptor toxicity in a model of retinal degeneration
Source: PubMed Central journal article supplement (PMC7694438; doi:10.1186/s12974-020-02032-8), 2020-11-27

# Supplementary Figure 1

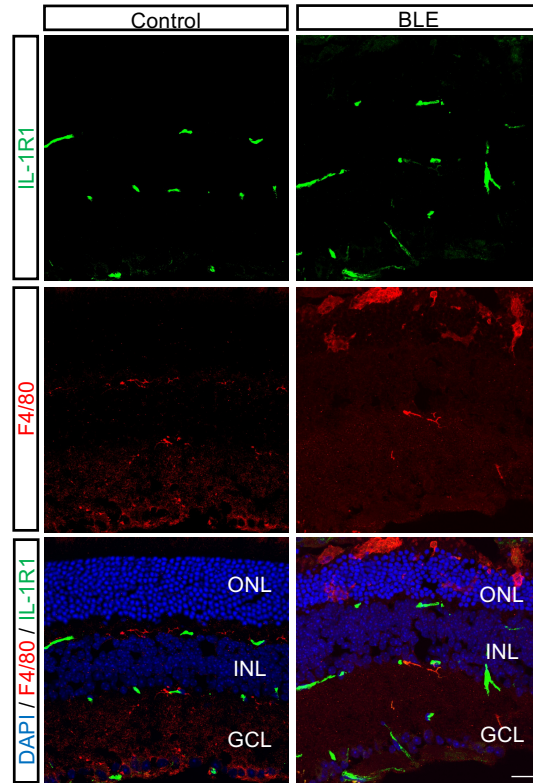

Supplement: 12974_2020_2032_MOESM1_ESM.pdf [file 12974_2020_2032_MOESM1_ESM.pdf]
